# Supplementary material for: The Nonribosomal Peptide Valinomycin: From Discovery to Bioactivity and Biosynthesis
Source: MDPI journal article supplement (doi:10.3390/microorganisms9040780), 2021-04-08
Supplement: s1 [file s1]

## Supplementary Information

### **The Nonribosomal Peptide Valinomycin: From Discovery to Bioactivity and Biosynthesis**

Shuhui Huang <sup>1,†</sup>, Yushi Liu <sup>1,†</sup>, Wan-Qiu Liu <sup>1</sup>, Peter Neubauer <sup>2,\*</sup> and Jian Li <sup>1,\*</sup>

<sup>1</sup> School of Physical Science and Technology, ShanghaiTech University, Shanghai, 201210, China

<sup>2</sup> Chair of Bioprocess Engineering, Department of Biotechnology, Technische Universität Berlin, 13355 Berlin, Germany

<sup>†</sup> These authors contributed equally.

\* Correspondence: lijian@shanghaitech.edu.cn (J.L); peter.neubauer@tu-berlin.de (P.N.)

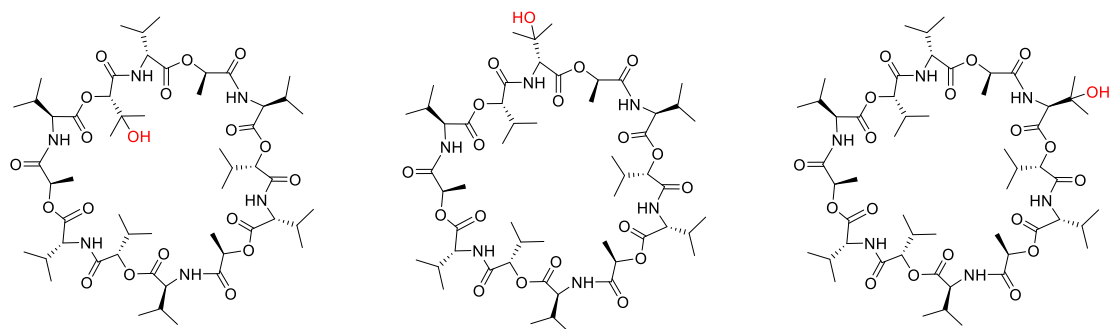

**Figure S1.** Valinomycin analogs with a hydroxyl group (OH) at the isopropyl side chain of D-Hiv (left), D-Val (middle), and L-Val (right), respectively.

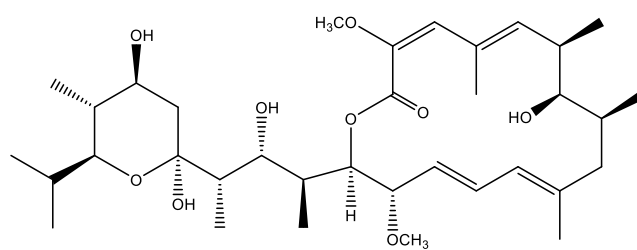

**Figure S2.** Chemical structure of bafilomycin.
